# Supplementary material for: Inpatient EHR User Experience and Hospital EHR Safety Performance
Source: PubMed Central journal article supplement (PMC10495862; doi:10.1001/jamanetworkopen.2023.33152), 2023-09-11
Supplement: jamanetwopen-e2333152-s001.pdf [file jamanetwopen-e2333152-s001.pdf]

## Supplemental Online Content

Classen D, Longhurst CA, Davis T, Milstein JA, Bates DW. Inpatient EHR user experience and hospital EHR safety performance. *JAMA Netw Open*. 2023;6(9):e2333152. doi:10.1001/jamanetworkopen.2023.33152

**eTable.** ARCH Survey Provider Respondent Specialty  
**eAppendix.** Further Details of Statistical Analysis

This supplemental material has been provided by the authors to give readers additional information about their work.

**eTable. ARCH Survey Provider Respondent Specialty**

| <b>Specialty</b>                   | <b>N</b> | <b>%</b> |
|------------------------------------|----------|----------|
| Anesthesiology                     | 231      | 4%       |
| Cardiology                         | 233      | 4%       |
| Cardiothoracic surgery             | 33       | 1%       |
| Critical care                      | 60       | 1%       |
| Dermatology                        | 42       | 1%       |
| Emergency medicine                 | 485      | 9%       |
| Endocrinology                      | 70       | 1%       |
| Family medicine                    | 383      | 7%       |
| Gastroenterology                   | 79       | 1%       |
| General surgery                    | 234      | 4%       |
| Geriatrics                         | 47       | 1%       |
| Gynecology and obstetrics          | 316      | 6%       |
| Hematology/oncology                | 95       | 2%       |
| Hospital medicine                  | 387      | 7%       |
| Infectious disease                 | 116      | 2%       |
| Internal medicine                  | 446      | 8%       |
| Multiple Specialties               | 357      | 6%       |
| Neonatology                        | 52       | 1%       |
| Nephrology                         | 71       | 1%       |
| Neurology                          | 143      | 3%       |
| Neurosurgery                       | 44       | 1%       |
| Oncology                           | 48       | 1%       |
| Ophthalmology                      | 46       | 1%       |
| Orthopedics                        | 179      | 3%       |
| Other (specialty not on this list) | 295      | 5%       |
| Otolaryngology                     | 53       | 1%       |
| Pathology                          | 62       | 1%       |
| Pediatrics                         | 387      | 7%       |
| Physical rehabilitation            | 36       | 1%       |
| Plastic surgery                    | 51       | 1%       |
| Psychiatry                         | 101      | 2%       |
| Pulmonology                        | 70       | 1%       |
| Radiology                          | 196      | 3%       |
| Rheumatology                       | 33       | 1%       |
| Urology                            | 57       | 1%       |
| Vascular surgery                   | 23       | 0%       |
| Unknown Specialty                  | 128      | 2%       |

## **eAppendix.** Further Details of Statistical Analysis

With respect to Table 5 we also completed the same regression with pooled errors by hospital but excluded all other covariates. Doing this, our results were very similar to our initial findings with the included covariates. The covariate for the regression of the overall Arch Experience Score and the Leapfrog Overall Safety score is nearly identical as that of Table 3 (beta= .012 vs. .011 in table 3), with both being statistically significant with  $p < .001$ .

We also completed the same series of regressions as in Table 5 with the Arch Collaborative variables structured as binary variables, with an answer of Strongly Agree/Agree categorized as '1' and other answers (Neutral/Disagree/Strongly Disagree) categorized as '0'. The results from this series of regressions were also nearly identical to the primary regression in Table 5, with different coefficients reflecting the change in model specification, but every regression found to be statistically significant ( $p < .05$ ).

We also completed a series of simple regressions with the hospital Leapfrog safety scores regressed against the average hospital Arch Collaborative overall score, similar to Tables 3 and 5. This model ignored the power of the multiple responses per hospital, and would be expected to have lower significance, which is exactly what we found. However, with only 112 observations, and including other covariates, the correlation between the Overall Leapfrog Safety Score and the Overall Arch Collaborative score was statistically significant ( $p < .01$ ) with actually a larger coefficient ( $B = .1$ ).
