# Supplementary material for: Inpatient EHR User Experience and Hospital EHR Safety Performance
Source: PubMed Central journal article supplement (PMC10495862; doi:10.1001/jamanetworkopen.2023.33152), 2023-09-11
Supplement: jamanetwopen-e2333152-s002.pdf [file jamanetwopen-e2333152-s002.pdf]

## Data Sharing Statement

Classen. Inpatient EHR User Experience and Hospital EHR Safety Performance. *JAMA Netw Open*. Published September 11, 2023. doi:10.1001/jamanetworkopen.2023.33152

### Data

**Data available:** No

### Additional Information

**Explanation for why data not available:** there is no patient data in this study and the only data is taken from surveys and simulation tests which have not been formatted for public access but if the editors wish we could discuss ways to make the data available
